# Supplementary material
Source: publisher figshare collection journal article supplement (https://gsajournals.figshare.com/ndownloader/files/14162813)
Supplement: Supplementary file 1 [file 14162813]

## Sheet: C_elegans_lin-44
Probe Set Name:
Cel_lin-44_Cy5
Probe Sequence (5' to 3'):
aatcaaaaggagctgctcgc
gttgaaagagcagtcgattg
ggccagggagcaaagaataa
tgatcgtcgggatctcattc
tttggcttaggtggttgaac
tgggcaaccctgtttcaaaa
gagcacgtgaatgcagaaga
gcatgccagttgaattgatc
attactgtagcaggatgtgt
ttcctgaactccttcgaacg
gattcgcacagttttgaagt
tcccattgctgaaatctcaa
aatatttccagcttccgaac
tcaataacggcggatcatgc
gagaagactctcggaaaccc
ggcagatgcagatgacaacg
caatcgtcaatccatccttg
attcattttgacccatctgg
tgagtacatccgccgaactc
cgttattccgtgttgaacac
ttgtgagcagctttcgacta
aacaaagtattcaccgctcc
cttcaaattgtgcttctcca
tctttttgatggccaatctc
ggcatttgcaggaagagatt
tgacaagaaccggatactcc
ttcgtttccagcaagttttc
atcggtaatgtgctcaaggg
cgtgcatacttttccactaa
atcatccgtatagagcttgg
aaatccgtcgtctttaccac
atccggagacgcttctaaat
caactgattttgccttgcaa
cttgggtatgcgtctcattc
caacacagccgatcacaatc
tcgtgacgaatgctgaatcc
tcacagtcacacttcacacg
cagattgcaacaccacacga
gcgatgttggatacaatcct
tcccattacacgtggatatc
aaaattaggcttttcggcgg

## Sheet: O_tipulae_lin-3
Probe Set Name:
Oti_lin-3-cy5
Probe Sequence (5' to 3'):
gcatttcttcgagggctcat
gagcactctctcgggaattg
gcaagcagccttctaggaaa
ctctcctttttgaaccagga
ctatgctgctgccttccagt
ttcgtttagggagctcgtcc
ttatcagtcctgtggtgaag
ggagcctcgtattttgttcc
tacttgctcgtcgacgagct
cttcgctctcttcgacgtat
gcaagctcggactcggactc
ggtattcctctatcagcgga
ggcattcgcgctcaatgtac
gacctcgacggtacagttgc
cgtaggcataggtcttcgga
ggacatatgcattcctttgt
gcgttttcccgtgtagcctg
tcttgatgtagtgctcctcg
ccttggacactgctgtagag
ctgtcgttgggctctcgacg
gctcagctcgtagctatccg
ggcctcctgaagcgagagaa
tatgactagctgcatctgga
aagaaggctaatgcagggac
cgacggctatgatgacaatt
tttctgtagctgtaggtggc
cacgacttttcgtcttgtca
gtcctcgcggagctactgct
gtgagttgatcgattccgtc
ccagtccttcggagatagta
taaggcgacctcgtattgta
cgtttccgttcacctcgaag
aacttgagtagcggcgacag
cggtagtgtcgtctgaccat
cggaaaactgctactatggg
gactcatttttcctcgacgg
cattttgagggctcgtcttc

## Sheet: O_tipulae_delta
Oligo Name:
O.tipulae-t837-lag-2_1 -Alexa580
Probe Sequence (5' to 3'):
agcaaagacagtagcactgc
gtcgagagttcagtttgagt
aatgcacacgtacaaccgtt
tttccaagaagacagtcggg
ctgcttccaagtagacgtag
tgttgaacatgaccgtcgag
aggagatctgagcattcttc
tatctctgctctgattggta
ttccagttcagattggaagc
agtcgtctccactgacaatg
cacatgaactggtcttgtct
agacgttttcagcacacacg
gaaaactttgcactgtggcc
cagtgaatccagacgaaggt
cgagagtcacaggtatagtg
atggttgcagattctttctc
tgcaatgaattccagtccag
gaactgacatctgcagatgc
tgctgacagtctcgatgtgg
agtgttgtccacgcagatac
attcctacagggattgtagg
ttggtgttggaacagattcc
agaagtttgtagaggatcca
gtaaccatttggacattggc
ctgcttttctcgcaatgagg
tttccattgttgcagatgtg
gtgacgttgtttactctcag
tagccggaaagacactcaca
tcttgatttcacagttgggg
ttggtttctccatcgatcac
ccgaagcaagacggacagat
atggccaattcgcatcgaga
aatacggtagcattggacgc
tgacgaagatgacgaaccgc
cgagtgtttcggcagttttc
agaatagcaccgactacagc
ctgtagaagaggtagtagcc
tagcgttgaccaagacgaga
tctctagaggtttctgtcat
tagacttttctggttccaga
tgtattctggagctcgactc
cgcttcaaaagaagaccgcg
gtgttgatgaataaggcggt
aggttgaggtgtctcatcga
atgttgtgtacttgtagggt
agaatcttgtttccgccaat
aggagagtctcttcagtttt
cagacaacaacaccttccga

## Sheet: O_tipulae_cwn-1
Probe Set Name:
Oti_cwn-1_cy5
Probe Sequence (5' to 3'):
aaggcaaattagttgcagcc
cgaaggcttcctctactaat
ttgcaatatgtgttcggtct
tcttgttaagtcccttaagc
tccatgaggcgtggatactg
aagcggcaccgactcgaatc
gtgaaactggaactggcact
gatccaggagggtacaattc
tccaaaacctgccgagtttc
tccttcggacaggagaacat
ggcagctgaaatggcatgaa
ggtcagaacagccaaccatg
attccgattccgtattgaac
agcatctacgaactctcgtg
gtgttattctttatcctctc
ccgattattgtgtaggttca
ctcaggcttttctccaaaac
tcatcccatgacatttgcac
acgtcttgacctcacaggat
ttgtctttgatcaagacgcc
ctcgacggcaacttcagagg
ttcatcacaagacgcggttg
gtgtcgtttgaactgactgt
ggatcacaatagtctgggga
tagaattccacgctcggcat
cattgcattctcttcccttg
ccatcaactccttgcgaagt
cgaagctggtcctctcgaag
tgcagttacacttttcttgc
acgcgacagcagtagtgaaa
aaatgacgttcgacacggcg

## Sheet: O_tipulae_cwn-2
Probe Set Name:
Oti_cwn-2_cy5
Probe Sequence (5' to 3'):
gagctcgttctttcacaaga
atagccagtgagcagtttag
gtaatcggggcaacgaactg
atgttcattttctcctgtga
ggcgtagatcatggtacaac
tctcgttcaaggagatcagt
ggattccattgaaggcgaat
aagagtaactcgatgccgtc
tgcccaaagaagtcttttgt
cttcatccgaacggagcaaa
attggagtagaccacgatgt
cttcagcatagcagttactg
tacaggtctggtggtcgaaa
aaagttttgggaggtcatgc
ctgtgaagcttccgtcaaag
cattccggtgaaagtccaag
attcgaggccgagagaattt
aagttgagctacgcttcatg
ggagggcagaatgagaagga
atcccgagtaatcattcttc
cagctgggacaattgggaag
ctttttggaattctctcgct
ggacgtcttcaagatggcaa
ggcacggcaaagtgaaatgc
agtgacttttttctagccag
agcgtctatgacagctaacg
aacacattggtcgtgcattc
ttcacatatcctagcttgac
ctggcatgtgatccttgaaa
gtgggctttgaattggtatt
cgaacggtgtcgaacagttc
acaggatggcgtacgtgaag
gtaaccgtagtcgacattgt
aatctgttcatcagtgaccg
atttgcatttgggagaggtg
atgttttcaggttgcaggag
cttttctgatcgaaggcagt
tacttgctctgaagcagttc
atgaattgcaagttgcctcg
tctccttgggaaaactgtca
tccaaaaagaccagatccgt
ttctacagtagtcgggtgag
aatgttccagaagacctgtc
ccacagcagagagaatcaca
ggcgaaagaattgtagccac
attgcatttggttttggtct
cttgcaacaccactcgaatt
ttggtacaggtctgacagac

## Sheet: O_tipulae_egl-20
Probe Set Name:
Oti_egl-20_cy5
Probe Sequence (5' to 3'):
gagaagtggaagacagcgga
gtgtaagtcttctcgtagga
tgattacaggctccccgaaa
tacttcaagtcgacgacagc
atgttgaccgaagccagaac
tcagcgtgaaactaccggaa
aatcctgagtatctctcgtg
accttgaagtcattactcga
tcagaacttcacagccttcg
cgatgtcgggatgtttactg
ctcttcacttcatacgtctg
agacccagtagatggaaagc
gtatgaaccgcgggcaagaa
tggaatctgtgggttatcgg
atcagaagtactgagcgtgg
gagagactggacgagctatg
cagagagcctcataatgagc
tgaacgggattgagaccgac
tctcgctacaaaggacatgc
aacttgaatgcctgctgaca
tatcgtgttggttagagcag
gggccatatggtgtctgaat
gtacttcccaggatgtcttg
caaaaatgccgtctcctttg
tgctggcagaggcaatagat
cccttggtaatggcatgaac
attctgtcagattgccagtg
cgacatatctttgcatcgcc
ttcgaagtccaggagtagac
ttgactccatacggaacgtt
cgagtcaaactgttgcttct
atttggaccagatggcttac
cctctcgaccgacgaaatta
tttccgaatatgctgtgcta
attcacaagaaccgctcact
atttggagccagcaggtttt
ctcagagacttccgagaact
atgatcgtatctcttcttca
tcttttagccacctgaacag
ctttcttttcttctcagtct
ttgcctcggagaggaatctg
tctctgaacgaaagccatct
taggattggcctcacagtaa
ccgtattatacgtttgttgc
acctctaccacagcataata
gacgttccattcgactattg
tttgcagtgacattgagttt
actcggacattaagcactct

## Sheet: O_tipulae_lin-44
Probe Set Name:
Oti_lin-44_cy5
Probe Sequence (5' to 3'):
ttcttcgtcagacgaattcc
tcggctcgataaacatcacc
acacgatcaccgaggaagac
ctgaatcgtcgttccgtttg
aatcgtgaccggaatcttct
catttgtgggtacagtagga
atgagaatgcgctcgattgt
gatagatgttgatggctcgg
gaaactgttcctgatcaggt
agtcgtacctgacttgaaga
tcgatctgactgaccatgag
gacgaagatggacagcggtc
agacgcgaagcatcgttttg
ttttttggagccatcagcat
ctcgatcatcagctggatat
atttcgatcgtgtcgcgata
aatcttcagcacatcgggag
ctttagtagcagtcgacgac
tttcgcgttgatgacgactc
agacgatctcgtcgatcgtg
agtttgtccatgttgtagtc
tcgtatttcttctttcgcat
tgaccagagaatagccacag
ccccaagtacaattgtcgaa
ggagtgagtttttgggcaat
atgcagtaaatcgggaggac
tcgaaggctgttgtttacat
ccttcaaaagctgccacaac
cattgggtaagtgcgtcttc
ctggtatttcatccgatctc
gggtcgtgaagaatgtttcc
atagccgtgacggagaagaa
cacgaacagtcaggaatcca
aaacttgcctgaccttcatt
gactcatcgtaataccgtgc
gtaggtttagtgagcagttt
gcattgagaggactcttgac
cttgaggttgtgtttcgaga
ctgcacgaagagatcagtgt
ctgacacgatccagacactc
gagagatgtggtccagattg
tcatcgacaaactgtctggc
atcagacagggatcgggaga
tccacaacagagtcgatcac
acacttgtagtggattacct
gattgcagcaccagacaaac
tggagacagtctcgacacac
agttacaggtagatacccag

## Sheet: O_tipulae_mom-2
Probe Set Name:
Oti_mom-2_cy5
Probe Sequence (5' to 3'):
tccggctgtctataacacat
atcttcagtccatctactac
gtactgacactcctcatgag
tccagacgtgaccacggaag
aggcaatcgcatagacgtag
cagagtgtgagtcagaccgg
cagttgcagtctggcagaag
gttgacttgtggagtcggag
ccttgagaagaggtccattg
gaacatccagcccagataaa
gcgtttccatatctgacatt
gtcgagaaacttccttccaa
cactgtgtttcttctcactg
tgaatgttcatcatgcctct
gaactggacagaagtcggcg
acatttgcattgtttttcca
gtgacacagcttccacttac
aacaaccttccagcatgtct
acagtcgagtcgcgaaatcg
cctgttgagctatctcatat
catgagttggttgctgctgg
cctcggaagttggtactctg
caacctgtttcaagtacctc
aagacgagctcgttcttgac
cagtagtcgggagaggaatc
agatctgcttgcagttgttg
ccgtacggaatgataacctc
ccaaatgaacttgcactcgc
cgtttgcaggtcttgcattt
acagtaattacggtcgacga
